# Supplementary material for: Comparison between quantitative computed tomography, scintigraphy, and anatomical methods for prediction of postoperative FEV1 and DLCO: effects of chronic obstructive pulmonary disease status and resected lobes
Source: PubMed Central journal article supplement — J Thorac Dis. 2020 Oct;12(10):5269–80. doi: 10.21037/jtd-20-1280 (PMC7656353; doi:10.21037/jtd-20-1280), 2020-10
Supplement: jtd-12-10-5269-dss.pdf [file jtd-12-10-5269-dss.pdf]

## Data Sharing Statement

|                     |                                                                                                                                                    |                                                                                                                                                 |
|---------------------|----------------------------------------------------------------------------------------------------------------------------------------------------|-------------------------------------------------------------------------------------------------------------------------------------------------|
| <b>Article Info</b> | <a href="http://dx.doi.org/10.21037/jtd-20-1280">http://dx.doi.org/10.21037/jtd-20-1280</a> .                                                      |                                                                                                                                                 |
| <b>Item</b>         | <b>Question</b>                                                                                                                                    | <b>Authors' Response<br/>(place "-" if not applicable)</b>                                                                                      |
| 1                   | Would you like to share data collected for your study to others?                                                                                   | No                                                                                                                                              |
| 2                   | If not, would you like to share the reason for your decision?                                                                                      | Ethics organization did not permit the data sharing for this study.                                                                             |
| 3                   | What data in particular will be shared?                                                                                                            | -                                                                                                                                               |
| 4                   | Any other documents will be share? Such as study protocol, statistical analysis plan, informed consent form, clinical study report, analytic code. | Statistical analysis plan and informed consent form will be shared if requested.                                                                |
| 5                   | When will data availability begin?                                                                                                                 | -                                                                                                                                               |
| 6                   | When will data availability end?                                                                                                                   | -                                                                                                                                               |
| 7                   | To whom will you share the data?                                                                                                                   | Pulmonologist and thoracic surgeons who are interested in studies of lobectomy.                                                                 |
| 8                   | For what type of analysis or purpose?                                                                                                              | For analysis to evaluate the safety of VATS lobectomy.                                                                                          |
| 9                   | How or where can the data/documents be obtained?                                                                                                   | Emails could be sent to the address below to obtain the shared documents:<br><a href="mailto:myoko@kitasato-u.ac.jp">myoko@kitasato-u.ac.jp</a> |
| 10                  | Any other restrictions?                                                                                                                            | We may balance the potential benefits and risks for each request and then provide the documents that could be shared.                           |
